# Supplementary material for: Sex Differences in the Effects of Repeated Taste Exposure to the Mediterranean Diet: A 6-month Follow-up Study
Source: Atypon-hosted journal article supplement (doi:10.3148/cjdpr-2015-052), 2016-02-26
Supplement: cjdpr-2015-052suppl.pdf [file cjdpr-2015-052suppl.pdf]

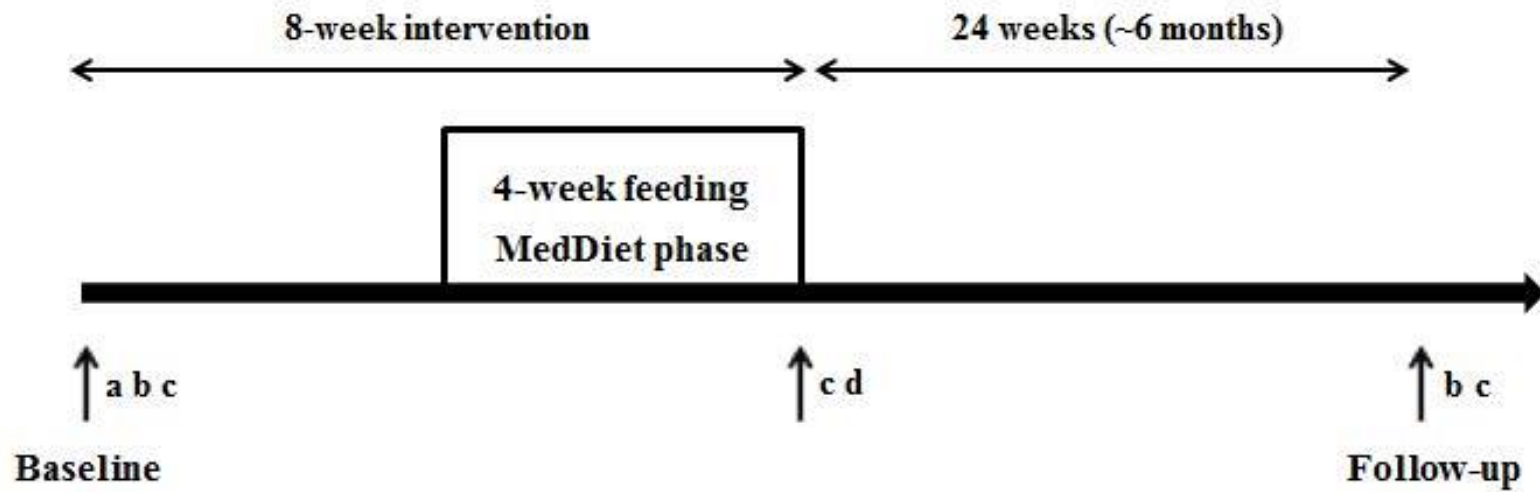

**Figure S1.** Study design. (a) Information about the recommendations of Canada’s Food Guide and personalized recommendations to follow these dietary principles were provided to participants. (b) Nutrient and dietary intakes were assessed. (c) Anthropometric measurements were performed. (d) A booklet including all Mediterranean diet (MedDiet) recipes of the 7-day cyclic menu and a lecture on the MedDiet were offered to participants.

**Table S1.** The 7-day cyclic menu used during the controlled Mediterranean diet intervention.

| Meals            | Monday        | Tuesday                     | Wednesday                        | Thursday                   | Friday                      | Saturday                | Sunday                      |
|------------------|---------------|-----------------------------|----------------------------------|----------------------------|-----------------------------|-------------------------|-----------------------------|
| <b>Breakfast</b> | MÜSLIX Cereal | Whole grain bread           | Bran muffin                      | MÜSLIX Cereal              | Bran muffin with raisins    | Whole grain bread       | Whole grain bread           |
|                  | Plain Yogurt  | Cottage cheese              | Plain Yogurt                     | Plain Yogurt               | Plain Yogurt                | Cottage cheese          | Omelet                      |
|                  | Cantaloupe    | Oranges                     | Strawberries and mango           | Dates                      | Raspberries and blueberries | Honeydew melon          | Grapefruit                  |
|                  | Almonds       | Almonds                     | Pistachios                       | Almonds                    |                             | Marmalade and margarine | Jalsberg cheese             |
|                  |               |                             |                                  |                            |                             |                         |                             |
| <b>Lunch</b>     | Shrimp rice   | Moussaka                    | Lemon chicken                    | Cod with grilled tomatoes  | Frittata                    | White Kidney bean soup  | Mushroom and Almond chicken |
|                  | Greek Salad   | Green salad and vinaigrette | Leek soup                        | Asparagus and orange salad | Couscous salad              | Quinoa salad            | Artichoke salad             |
|                  |               | Wheat Baguette              | Peppers, zucchini and brown rice | Vegetable couscous         | Vegetable soup and bread    | Whole grain bread       | Green beans and brown rice  |
|                  | Red grapes    | Dried Fruits                | Fruit Salad                      | Almond cake                | Green grapes                | Fruit Salad             | Honeydew melon              |

| Meals                                        | Monday                          | Tuesday               | Wednesday                     | Thursday                | Friday                         | Saturday                | Sunday                           |
|----------------------------------------------|---------------------------------|-----------------------|-------------------------------|-------------------------|--------------------------------|-------------------------|----------------------------------|
| <b>Dinner</b>                                | Chicken cacciatore and broccoli | Trout and green beans | Greek Tilapia grilled peppers | Pasta Primavera         | Tuna pasta                     | Chicken with vegetables | Chick pea and vegetable couscous |
|                                              | Butternut squash soup           | Vegetable salad       | Spinach salad                 | White Kidney bean salad | Broccoli and cauliflower salad | Cheese and nut salad    | Tomato and pepper soup           |
|                                              | Potatoes                        | Mushroom Risotto      | Bulgur                        |                         |                                |                         |                                  |
|                                              | Fruit Salad                     | Honeydew melon        | Green grapes                  | Oranges                 | Dates                          | Cantaloupe              | Baklava                          |
| <b>Red wine with each dinner of the week</b> |                                 |                       |                               |                         |                                |                         |                                  |
